# Supplementary material for: RAFT Hydroxylated Polymers as Templates and Ligands for the Synthesis of Fluorescent ZnO Quantum Dots
Source: MDPI journal article supplement (doi:10.3390/nano12193441), 2022-10-01
Supplement: s1 [file s1]

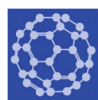

Supplementary Materials for

# RAFT hydroxylated polymers as templates and ligands for the synthesis of Fluorescent ZnO Quantum Dots

Leire San José, Olga García, Isabel Quijada-Garrido\* and Mar López-González\*

Group of Nanohybrids and Interactive Polymers. Instituto de Ciencia y Tecnología de Polímeros (ICTP-CSIC), C/ Juan de la Cierva, 3. 28006 Madrid, Spain

\*Correspondence: [iquijada@ictp.csic.es](mailto:iquijada@ictp.csic.es); [mar@ictp.csic.es](mailto:mar@ictp.csic.es)

Keyword: ZnO QDs; hydroxylated RAFT polymers; nanohybrids; fluorescent nanomaterials.

- Figure S1.**  $^1\text{H}$ -NMR spectra corresponding to (a) hydrophilic pPEGMEMA ( $\text{EG}_{21\text{k}}$ ) used as macro-CTA for block copolymer synthesis (in  $\text{CDCl}_3$ ), (b) pHPMA homopolymer ( $\text{HP}_{8\text{k}}$ ) (in  $\text{DMSO-d}_6$ ), (c) pPPGMA homopolymer ( $\text{PG}_{17\text{k}}$ ) (in  $\text{CDCl}_3$ ), (d)  $^1\text{H}$ - $^{13}\text{C}$  HSQC spectrum of  $\text{HP}_{6\text{k}}$  in  $\text{DMSO-d}_6$ , and (e)  $^1\text{H}$ - $^{13}\text{C}$  HSQC spectrum of  $\text{PG}_{17\text{k}}$  in  $\text{CDCl}_3$ . Wrapped in dashed line the minor isomers of pHPMA and pPPGMA..... 2
- Figure S2.** SEC traces obtained for a series of EG-PG diblock copolymers (a) and EG-HP diblock copolymers (b) in DMF..... 3
- Figure S3.**  $^1\text{H}$ -NMR spectra corresponding to (a) pPEGMEMA-*b*-pHPMA ( $\text{EG}_{21\text{k}}$ - $\text{HP}_{5\text{k}}$ ) and (b) pPEGMEMA-*b*-pPPGMA ( $\text{EG}_{21\text{k}}$ - $\text{PG}_{14\text{k}}$ ) block copolymer, both in  $\text{CDCl}_3$ . Wrapped in dashed line the minor isomers of pHPMA and pPPGMA..... 3
- Figure S4.** (a) Fluorescence quantum yield ( $\Phi_F$ ) of ZnO QDs as a function of reaction temperature. (b) Evolution of the emitted fluorescence intensity as a function of reaction time for ZnO QDs synthesized at 30 °C..... 4
- Figure S5.** Time evolution of the integrated emission of the hybrid ZnO@polymer in ethanol and water..... 4
- Figure S6.** Time evolution of the integrated emission of water dispersions of ZnO QDs synthesized in the presence of TE, TO, and AP silanes or a combination of two of them as indicated..... 5
- Figure S7.** Variation in the ZnO QDs size determined by TEM as a function of the ligand or combination of ligands..... 5
- Figure S8.** X-ray diffraction patterns corresponding to representative ZnO QDs with polymer, silane, and a combination of silane-polymer coating. The size determined from XRD are included in the figure..... 6
- Figure S9.** (a) Absorbance (dashed lines) and emission fluorescence ( $\lambda_{\text{exc.}} = 365 \text{ nm}$ ) (solid lines) bands from ethanol and aqueous solutions of ZnO@AP-EG $_{21\text{k}}$ -HP $_{9\text{k}}$ . (b) Images of ZnO@AP-EG $_{21\text{k}}$ -HP $_{9\text{k}}$  and ZnO@AP-EG $_{12\text{k}}$ -PG $_{14\text{k}}$  QDs in EtOH and water under UV (365 nm) and visible light..... 6
- Figure S10.** (a) Selectivity of ZnO@AP-EG $_{21\text{k}}$ -HP $_{9\text{k}}$  towards different metal ions ( $[\text{Metal ion}] = 100 \mu\text{M}$ ); (b) ratio between initial integrated emission and integrated emission ( $F_0/F$ ) of ZnO@AP-EG $_{21\text{k}}$ -HP $_{9\text{k}}$  in the presence of 100  $\mu\text{M}$  of the indicated metals; (c) Stern–Volmer plot corresponding to ZnO@AP-EG $_{21\text{k}}$ -HP $_{9\text{k}}$  quenched by  $\text{Cu}^{2+}$ ; (d) decrease in fluorescence emission intensity of ZnO@AP-EG $_{21\text{k}}$ -HP $_{9\text{k}}$  as a function of  $\text{Cu}^{2+}$  concentration (5–100  $\mu\text{M}$ )..... 7

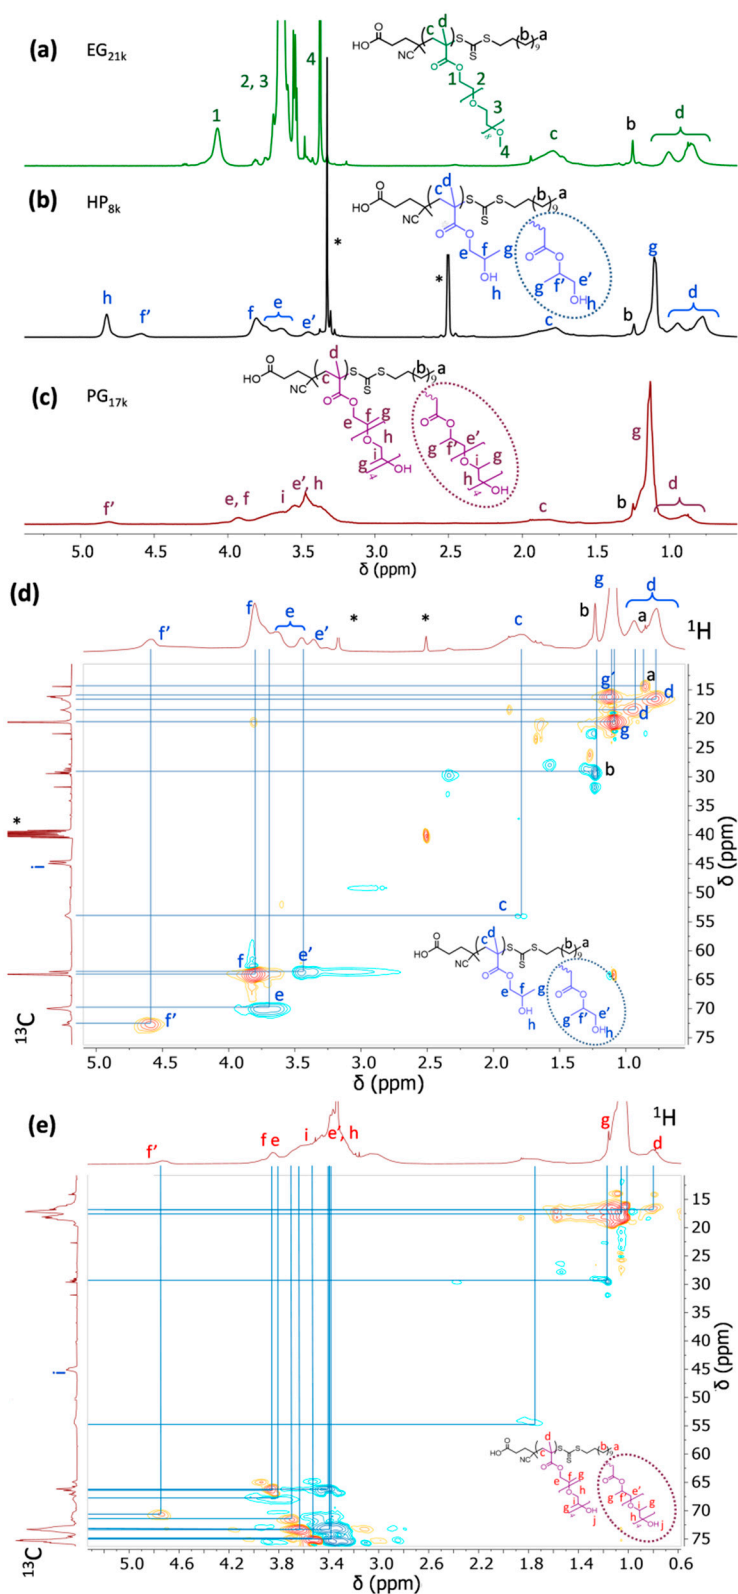

**Figure S1.** <sup>1</sup>H-NMR spectra corresponding to (a) hydrophilic pPEGMEMA (EG<sub>21k</sub>) used as macro-CTA for block copolymer synthesis (in CDCl<sub>3</sub>), (b) pHPMA homopolymer (HP<sub>8k</sub>) (in DMSO-d<sub>6</sub>), (c) pPPGMA homopolymer (PG<sub>17k</sub>) (in CDCl<sub>3</sub>), (d) <sup>1</sup>H-<sup>13</sup>C HSQC spectrum of HP<sub>6k</sub> in DMSO-d<sub>6</sub>, and (e) <sup>1</sup>H-<sup>13</sup>C HSQC spectrum of PG<sub>17k</sub> in CDCl<sub>3</sub>. Wrapped in dashed line the minor isomers of pHPMA and pPPGMA.

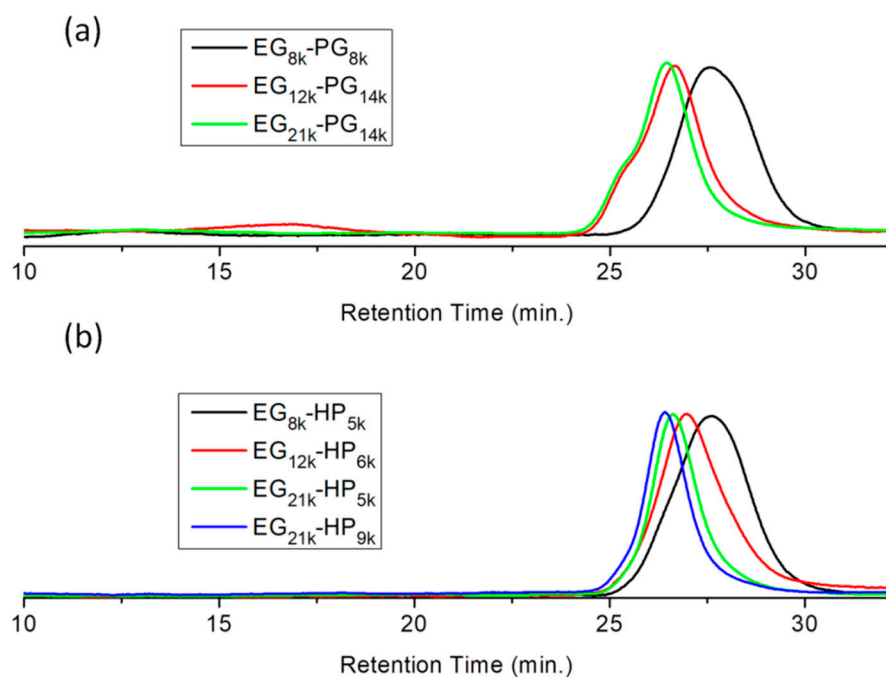

**Figure S2.** SEC traces obtained for a series of EG-PG diblock copolymers (a) and EG-HP diblock copolymers (b) in DMF.

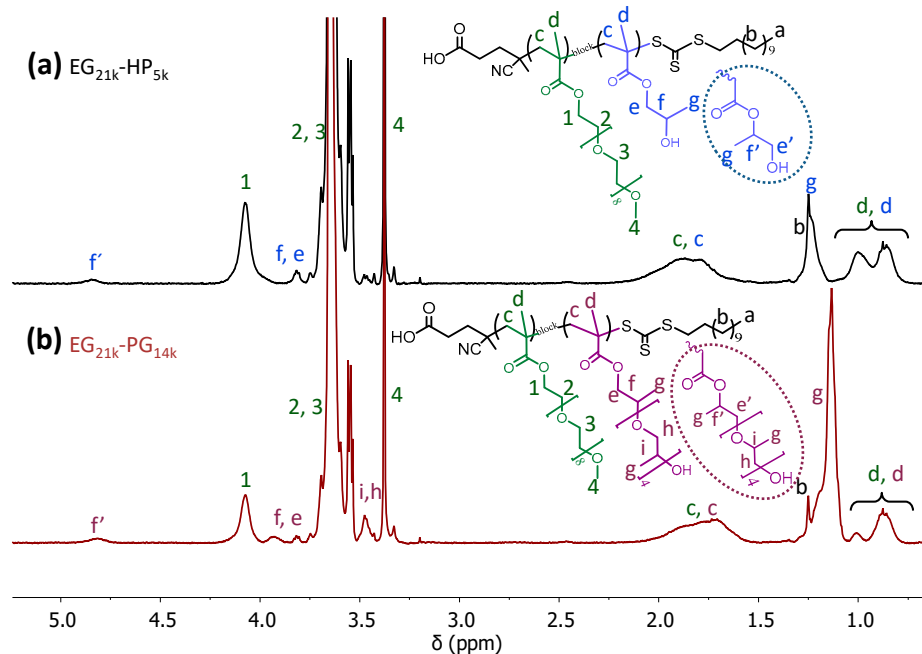

**Figure S3.**  $^1\text{H}$ -NMR spectra corresponding to (a) pPEGMEMA-*b*-pHPMA (EG<sub>21k</sub>-HP<sub>5k</sub>) and (b) pPEGMEMA-*b*-pPPGMA (EG<sub>21k</sub>-PG<sub>14k</sub>) block copolymer, both in CDCl<sub>3</sub>. Wrapped in dashed line the minor isomers of pHPMA and pPPGMA.

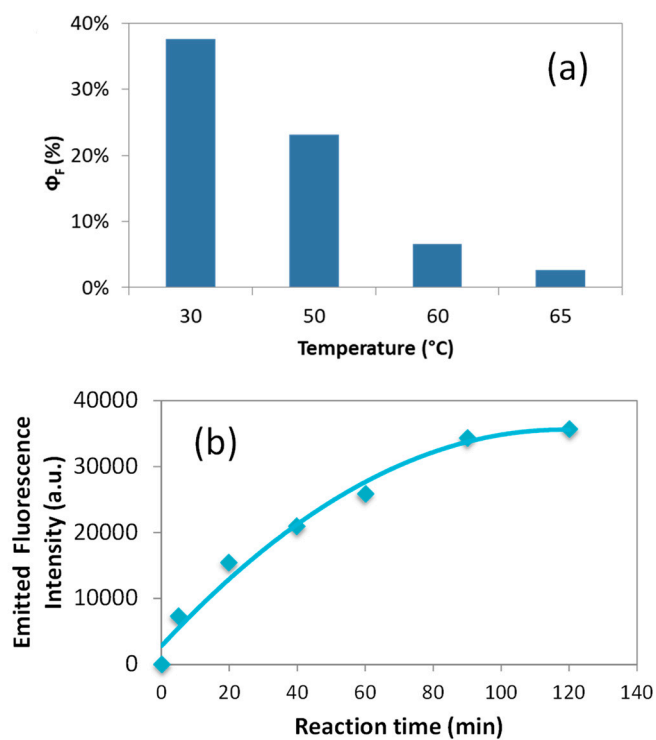

**Figure S4.** (a) Fluorescence quantum yield ( $\Phi_F$ ) of ZnO QDs as a function of reaction temperature. (b) Evolution of the emitted fluorescence intensity as a function of reaction time for ZnO QDs synthesized at 30 °C.

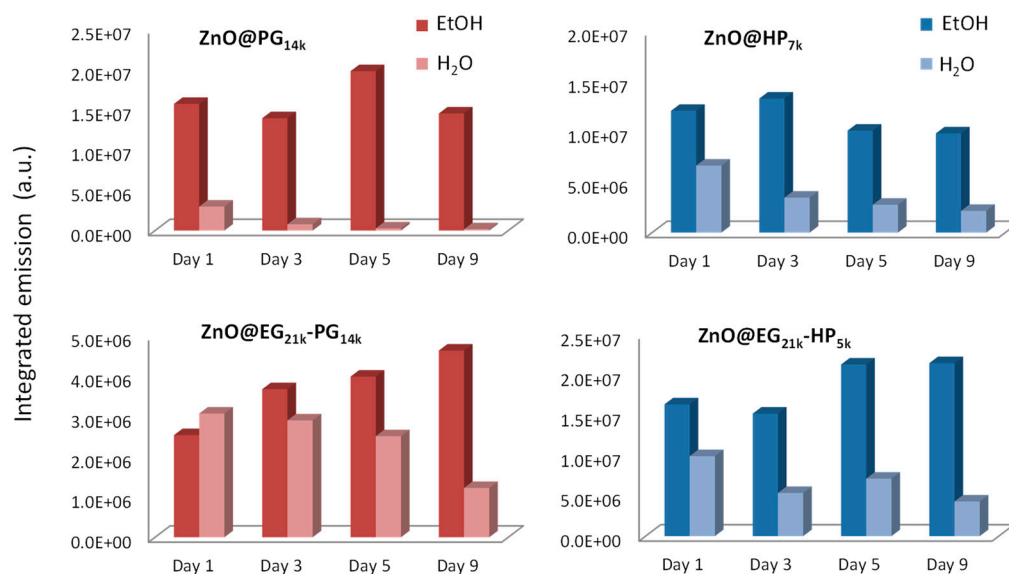

**Figure S5.** Time evolution of the integrated emission of the hybrid ZnO@polymer in ethanol and water.

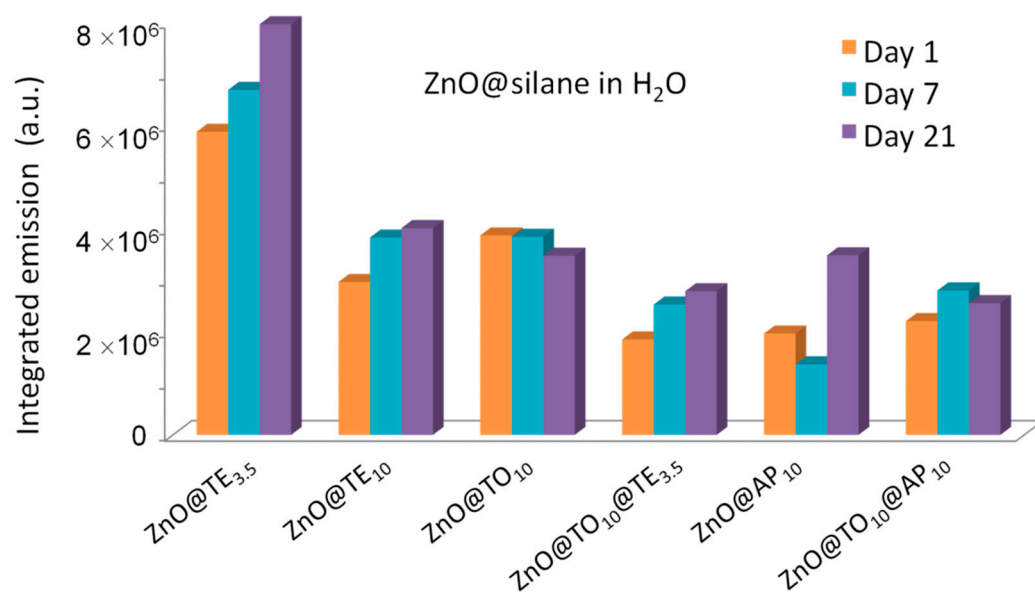

**Figure S6.** Time evolution of the integrated emission of water dispersions of ZnO QDs synthesized in the presence of TE, TO, and AP silanes or a combination of two of them as indicated.

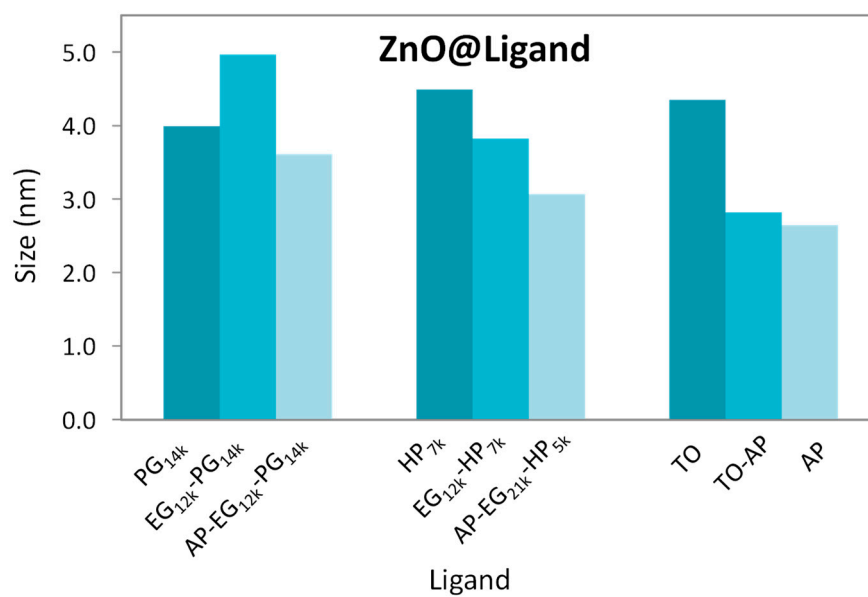

**Figure S7.** Variation in the ZnO QDs size determined by TEM as a function of the ligand or combination of ligands.

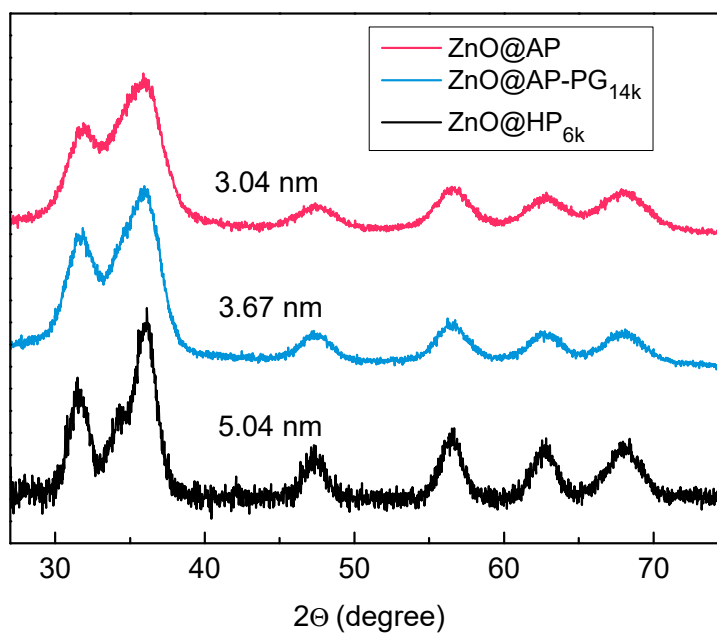

**Figure S8.** X-ray diffraction patterns corresponding to representative ZnO QDs with polymer, silane, and a combination of silane-polymer coating. The size determined from XRD are included in the figure.

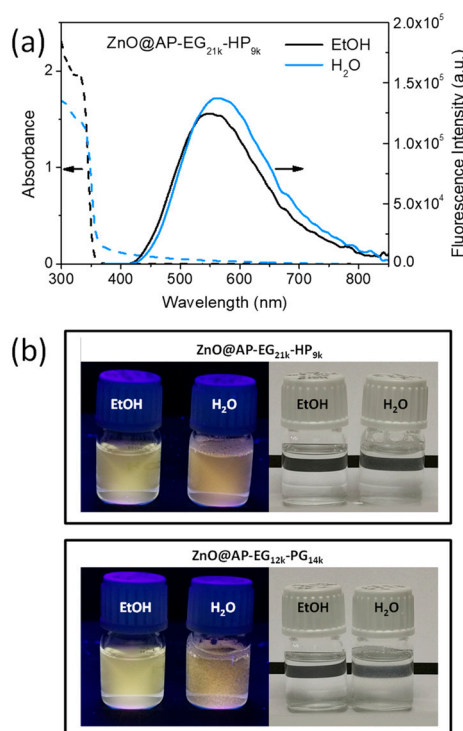

**Figure S9.** (a) Absorbance (dashed lines) and emission fluorescence ( $\lambda_{\text{exc.}} = 365 \text{ nm}$ ) (solid lines) bands from ethanol and aqueous solutions of ZnO@AP-EG<sub>21k</sub>-HP<sub>9k</sub>. (b) Images of ZnO@AP-EG<sub>21k</sub>-HP<sub>9k</sub> and ZnO@AP-EG<sub>12k</sub>-PG<sub>14k</sub> QDs in EtOH and water under UV (365 nm) and visible light.

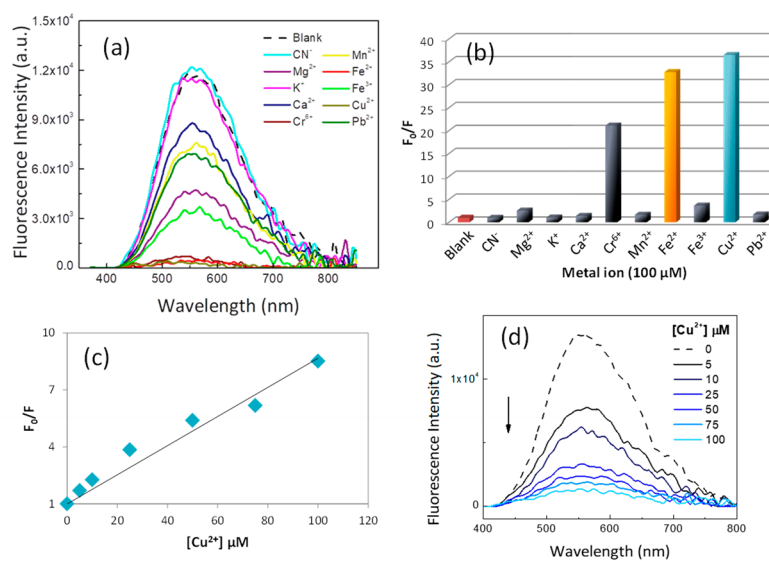

**Figure S10.** (a) Selectivity of ZnO@AP-EG<sub>21k</sub>-HP<sub>9k</sub> towards different metal ions ([Metal ion]=100  $\mu$ M); (b) ratio between initial integrated emission and integrated emission ( $F_0/F$ ) of ZnO@AP-EG<sub>21k</sub>-HP<sub>9k</sub> in the presence of 100  $\mu$ M of the indicated metals; (c) Stern–Volmer plot corresponding to ZnO@AP-EG<sub>21k</sub>-HP<sub>9k</sub> quenched by Cu<sup>2+</sup>; (d) decrease in fluorescence emission intensity of ZnO@AP-EG<sub>21k</sub>-HP<sub>9k</sub> as a function of Cu<sup>2+</sup> concentration (5–100  $\mu$ M).
